# Supplementary material for: CO2 activation on Cu-based Zr-decorated nanoparticles
Source: Royal Society of Chemistry journal article supplement (doi:10.1039/c6cy02628a), 2017-01-01
Supplement: c6cy02628a1.pdf [file c6cy02628a1.pdf]

## Supporting Information

### CO<sub>2</sub> Activation on Cu-based Zr-Decorated Nanoparticles

Natalie Austin, Jingyun Ye and Giannis Mpourmpakis\*

Department of Chemical Engineering, University of Pittsburgh, Pittsburgh, Pennsylvania 15261,  
United States

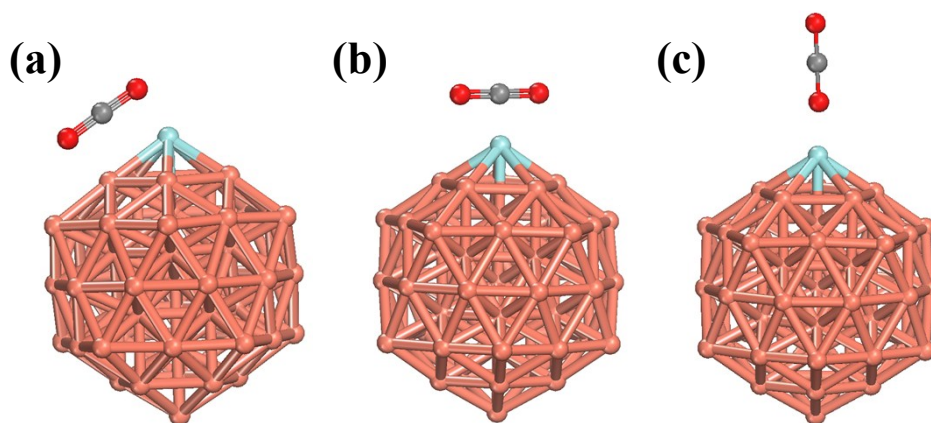

**Figure S1.** Three initial adsorption configurations of CO<sub>2</sub> on the Cu<sub>54</sub>Zr NP were considered: (a) CO<sub>2</sub> molecule parallel to the Cu-Zr bond, (b) CO<sub>2</sub> adsorption to the NP with C of CO<sub>2</sub> interacting with Zr on the NP, and (c) perpendicular CO<sub>2</sub> adsorption with the O atom pointing to Zr.

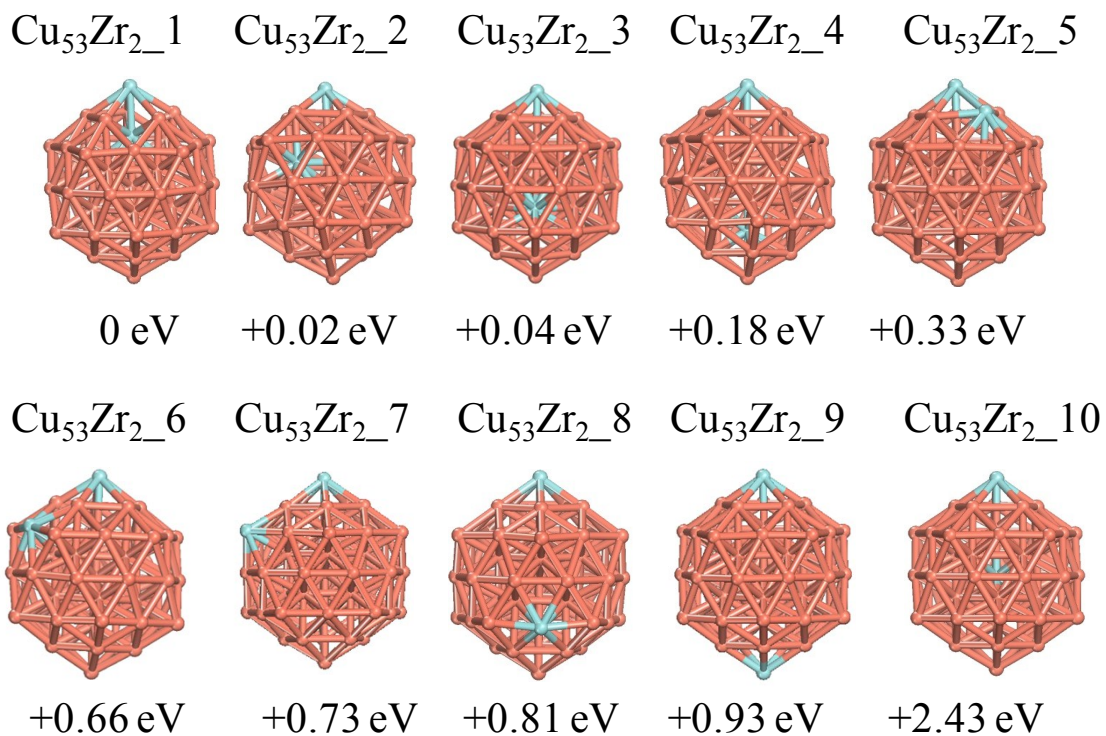

**Figure S2a.** Different dopant sites of two Zr atoms in the 55-atom  $\text{Cu}_{53}\text{Zr}_2$  NP. The value below each NP is the stability of the NPs relative to the most stable structure found ( $\text{Cu}_{53}\text{Zr}_2\_1$ ).

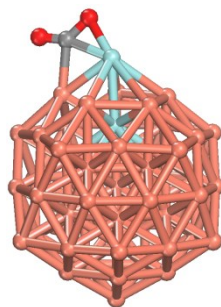

$$\text{BE}(\text{CO}_2) = -1.18 \text{ eV}$$

**Figure S2b.** Chemisorbed  $\text{CO}_2$  on  $\text{Cu}_{53}\text{Zr}_2\_1$  (most stable  $\text{Cu}_{53}\text{Zr}_2$  nanoparticle). The binding energy of  $\text{CO}_2$  has been calculated to be -1.18 eV, which is strong and comparable to the segregated case of Zr.

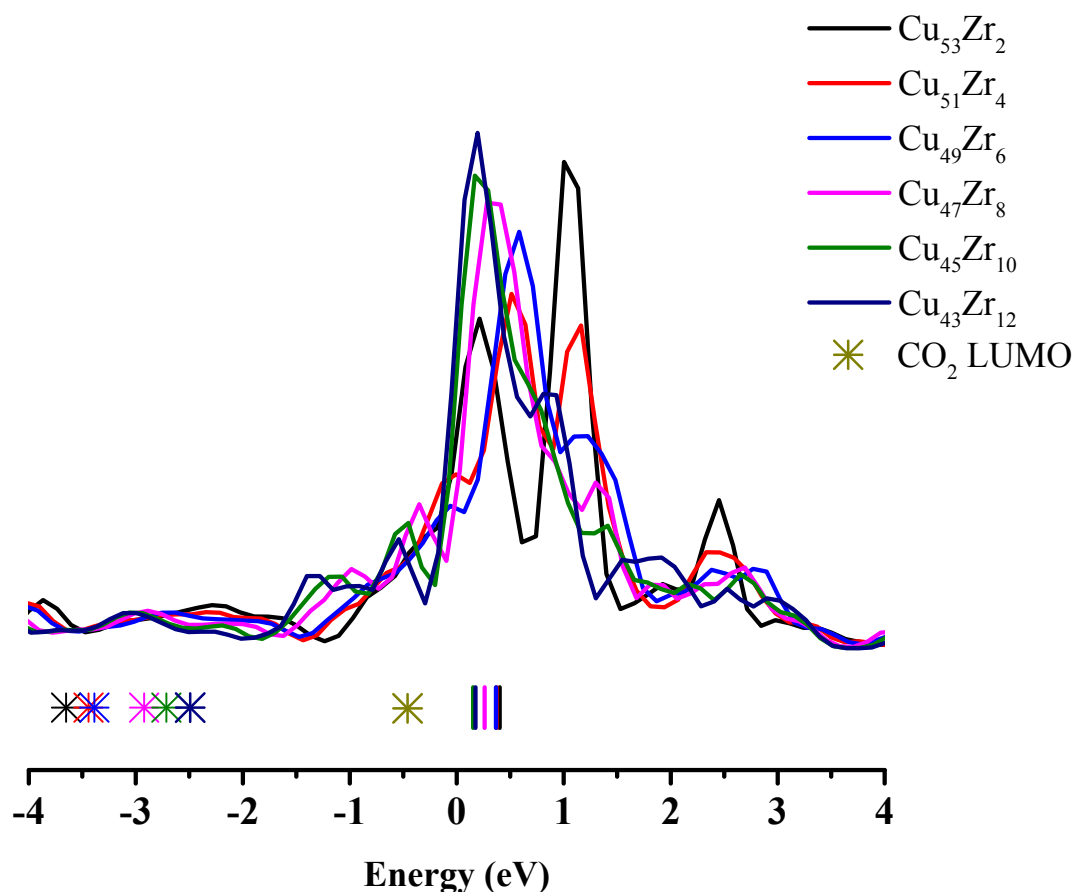

**Figure S3.** Local partial density of states (PDOS) of the d electrons for the Cu<sub>55-x</sub>Zr<sub>x</sub> NPs. The asterisks and the solid lines below the PDOS represent the HOMO orbital energies and d<sub>C</sub> of the Cu<sub>55-x</sub>Zr<sub>x</sub> NPs. (x = 2 -12), respectively. The green asterisk corresponds to the LUMO orbital of the CO<sub>2</sub> molecule. It should be noticed that the increasing Zr content brings the NP HOMO orbitals closer to the CO<sub>2</sub> LUMO, resulting to stronger CO<sub>2</sub> adsorption. The IP correlations presented in Figure 5(b) of the manuscript are relevant to the energy of the HOMO orbitals (HOMO energy can approximate the IP).
